# Supplementary material for: NRF2 Is an Upstream Regulator of MYC-Mediated Osteoclastogenesis and Pathological Bone Erosion
Source: Cells. 2020 Sep 21;9(9):2133. doi: 10.3390/cells9092133 (PMC7564846; doi:10.3390/cells9092133)
Supplement: Supplementary file 1 [file cells-09-02133-s001.pdf]

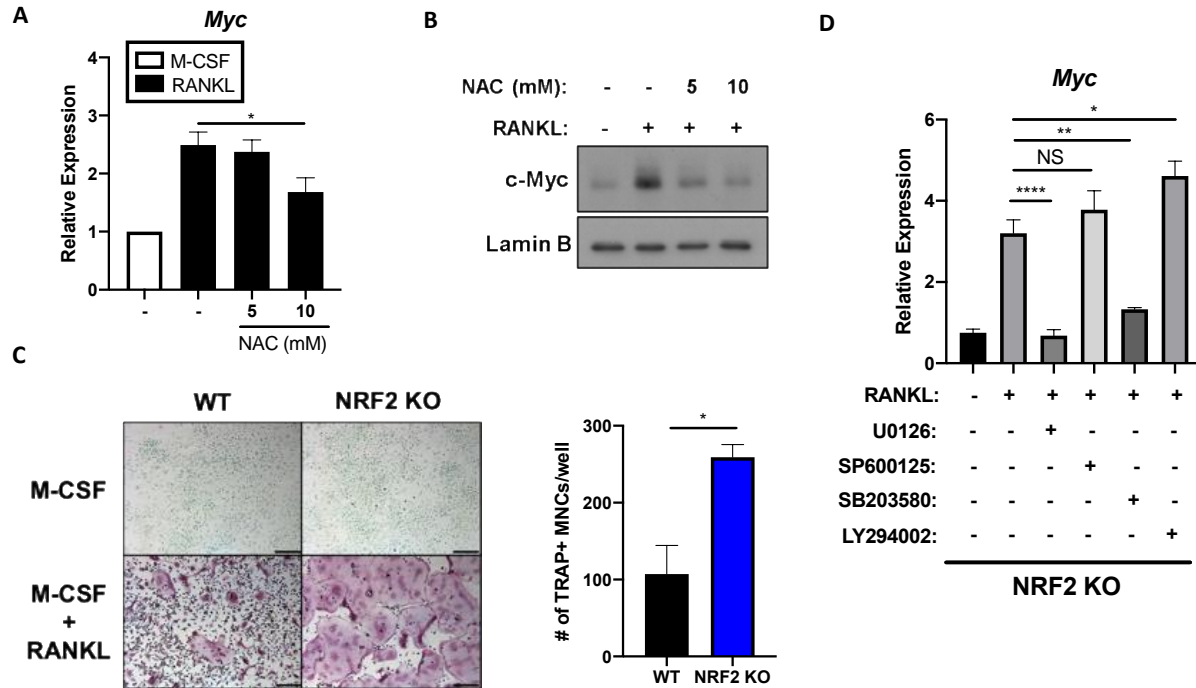

**Supplementary Figure 1.** Expression of MYC after treatment with N-acetylcysteine (NAC). (A,B) Mouse OCPs were pre-treated with the indicated concentration of N-acetylcysteine (NAC) for 30 minutes and then stimulated with RANKL (50 ng/ml) for 6 hours. (A) The mRNA expression of *Myc* (relative to the *Hprt* housekeeping gene,  $n=5$ ). (B) Immunoblot of nuclear protein lysates using c-MYC and Lamin B antibodies. Lamin B served as the loading control. Data are representative of five experiments. (C) Osteoclast differentiation of WT and NRF2-deficient (NRF2 KO) OCPs after stimulation with RANKL (50 ng/ml) for 2 days. Representative images of the TRAP stained cells are shown. Scale bar: 50  $\mu$ m. TRAP-positive, multinucleated (more than three nuclei) cells were counted in triplicates from four experiments. (D) NRF2-deficient OCPs were pretreated with either DMSO (vehicle), U0126 (5  $\mu$ M), SP600125 (5  $\mu$ M), SB203580 (10  $\mu$ M) or LY294002 (5  $\mu$ M) for 30 minutes and then stimulated with RANKL (50 ng/ml) for 6 hours. The mRNA expression of *Myc* (relative to the *Hprt* housekeeping gene,  $n=3$ ). All data are shown as mean  $\pm$  s.e.m. \* $P < 0.05$ , \*\* $P < 0.01$ , and \*\*\*\* $P < 0.0001$  by one-way ANOVA in A,D and by two-tailed, unpaired t-test in C; NS, not significant.

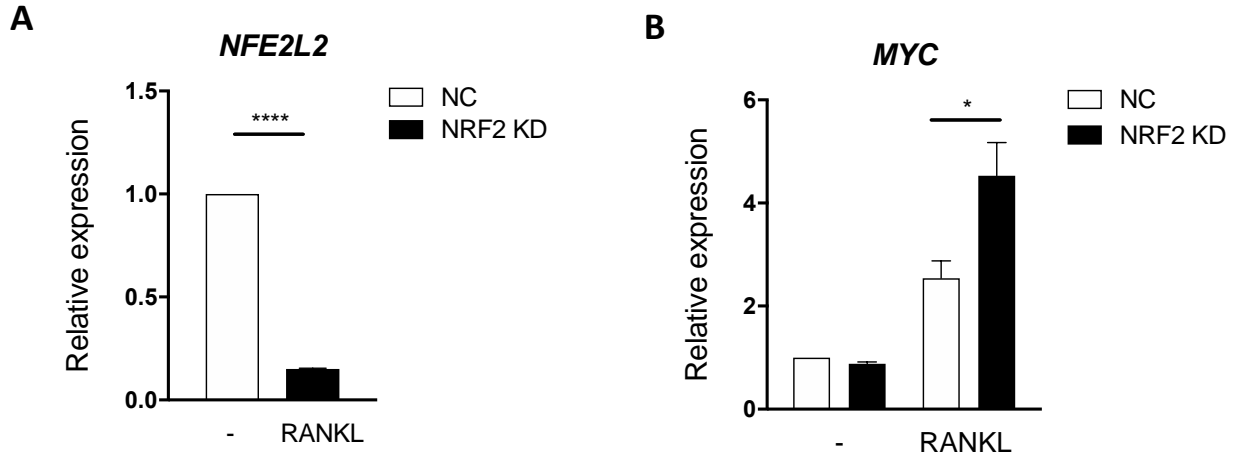

**Supplementary Figure 2.** NRF2 regulates MYC expression in human osteoclastogenesis. Primary human monocytes were nucleofected with negative control (NC) or NRF2-specific small interfering RNAs (siRNAs) and then stimulated with RANKL (40 ng/ml). **(A)** The mRNA expression of *NRF2* (*NFE2L2*, relative to the *HPRT* housekeeping gene) after transfection ( $n=4$ ). **(B)** The mRNA expression of *MYC* (relative to the *HPRT* housekeeping gene) at 9 hours following RANKL stimulation ( $n=4$ ). Data are shown as mean  $\pm$  s.e.m. from three independent experiments with four independent donors. \*\*\*\*  $P < 0.001$  by two-tailed, unpaired t-test in **A**; \*  $P < 0.05$  by two-way ANOVA in **B**.

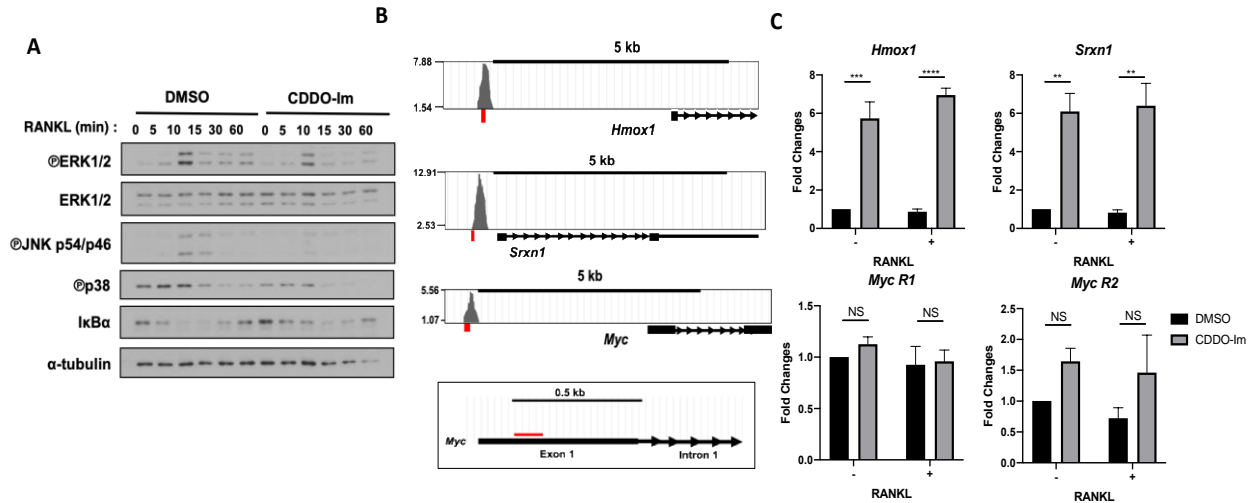

**Supplementary Figure 3.** NRF2 indirectly regulates MYC transcription. (A) Immunoblot of total cell protein lysates using p-ERK1/2, ERK1/2, p-JNK, p-p38, IκBα, and α-tubulin antibodies. 20 nM of CDDO-Im and 100 ng/ml of RANKL for the indicated times were used for this experiment. α-tubulin served as the loading control. Data are representative of three experiments. (B,C) Mouse OCPs were pretreated with DMSO or CDDO-Im (20 nM) for 30 minutes and then stimulated with RANKL (50 ng/ml) for 6 hours. Afterwards, cells were fixed and processed for ChIP (chromatin immunoprecipitation). (B) ChIP-seq track near the promoter region of *Hmox1*, *Srnx1* and *Myc* genes as well as the first exon of *Myc* on the UCSC genome browser based on publicly available data. Red rectangles indicate where the designed ChIP-qPCR primers bind to. (C) ChIP qPCR analysis of potential NRF2 binding sites for *Hmox1*, *Srnx1* and *Myc* gene promoter regions (normalized to *Hbb-b1* gene). *Myc* binding primers targets the NRF2 binding region upstream of the *Myc* gene while the *myc* promoter primers bind to the first exon of MYC where it contains the potential RNA polymerase III promoter sequence ( $n=3$ ). All data are shown as mean  $\pm$  s.e.m. \*\* $P < 0.01$ , \*\*\* $P < 0.001$ , and \*\*\*\* $P < 0.0001$  by two-way ANOVA; NS, not significant.

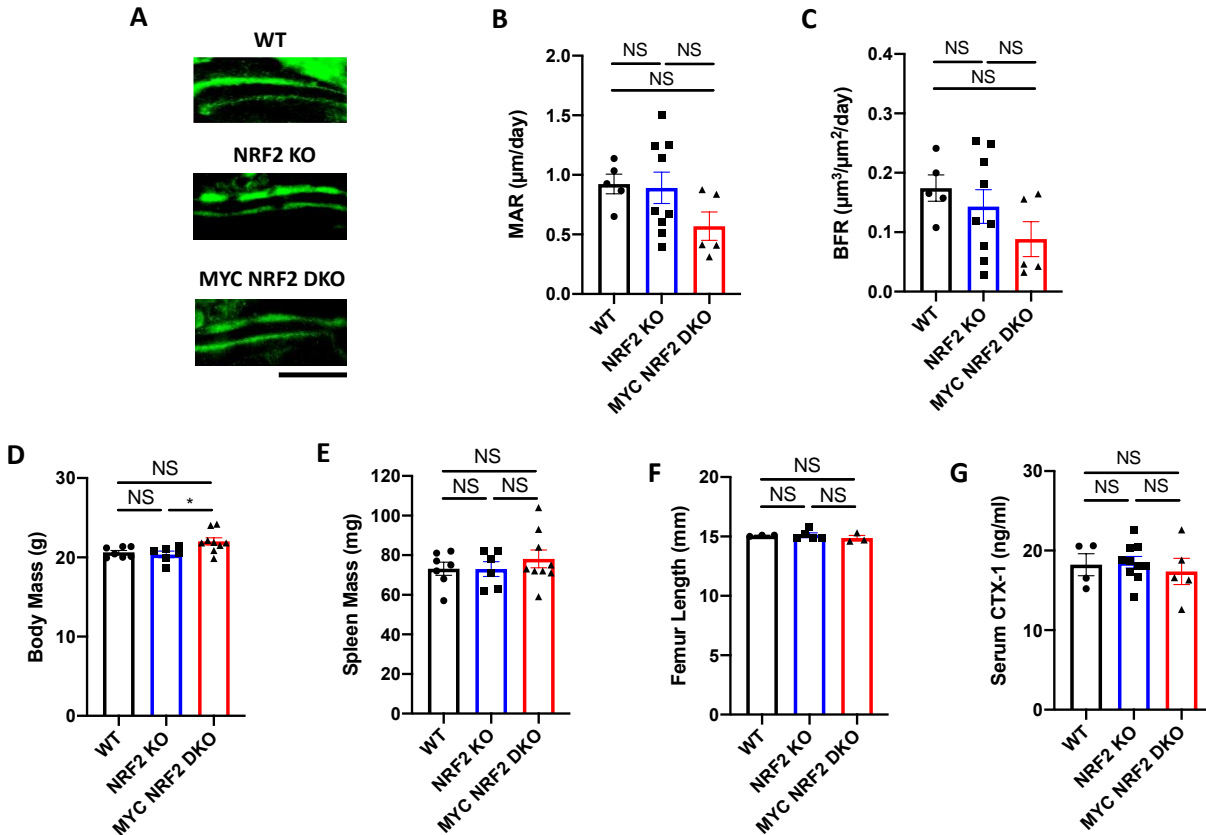

**Supplementary Figure 4.** Myeloid-specific MYC/NRF2-deficient mice exhibit decreased mineral apposition rate (MAR). **(A,B,C)** Bone formation parameters of 12 to 13 weeks old female WT, NRF2-deficient (NRF2 KO), and myeloid-specific MYC/NRF2-deficient (MYC<sup>ΔM</sup>/NRF2 DKO) mice (n  $\geq$  5). **(A)** Representative images of calcein double labeling in the trabecular bone. Scale bars: 10  $\mu$ m. Bone formation parameters such as **(B)** mineral apposition rate (MAR) and **(C)** bone formation rate (BFR). **(D,E,F,G)** Body mass **(D)**, spleen mass **(E)**, femur length **(F)**, and serum level of CTX-1 **(G)** of 12 to 13 weeks old female WT, NRF2 KO, and MYC<sup>ΔM</sup>/NRF2 DKO mice. Data are shown as mean  $\pm$  s.e.m. of at least four mice per group. \* $P < 0.05$ ; NS, not significant by one-way ANOVA in **B,D,E,G** and by Kruskal-Wallis test in **C,F**.

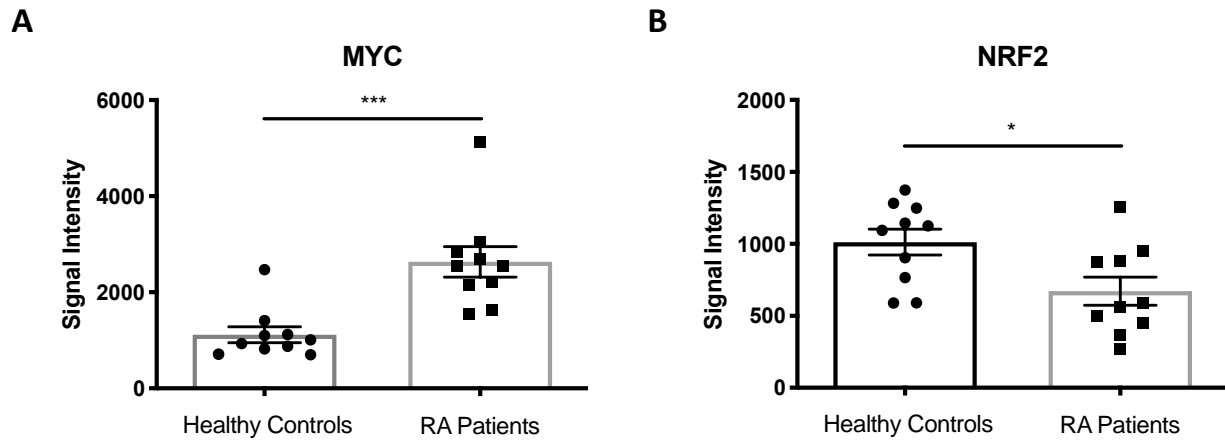

**Supplementary Figure 5.** The inverse relationship between MYC and NRF2 in synovial CD14<sup>+</sup> macrophages isolated from rheumatoid arthritis. **(A,B)** Comparisons of NRF2 and MYC expressions in synovial CD14<sup>+</sup> macrophages isolated from the joints of healthy controls or patients with rheumatoid arthritis (RA). Publicly available dataset (GEO: GSE97779) was used for the data ( $n=10$ ). All data are shown as mean  $\pm$  s.e.m. \*\*\* $P < 0.001$  by two-tailed, Mann Whitney test in **A** and \* $P < 0.05$  by two-tailed, unpaired t-test in **B**.

**Supplementary Table 1.** The list of primers used in the study.

| <b>Gene Symbol</b> | <b>Quantitative PCR Primer Sequence</b>                          |
|--------------------|------------------------------------------------------------------|
| <i>MYC</i>         | F: 5'-GTGCATCGACCCCTCGGTGG-3'<br>R: 5'-TTGCGAGGCGCAGGACTTGG-3'   |
| <i>NFLE2L2</i>     | F: 5'-GTCCCAGCAGGACATGGAT-3'<br>R: 5'-CGTCGCTGACTGAAGTCAAAT-3'   |
| <i>HPRT</i>        | F: 5'-GACCAGTCAACAGGGGACAT-3'<br>R: 5'-CCTGACCAAGGAAAGCAAAG-3'   |
| <i>Myc</i>         | F: 5'-GCCGATCAGCTGGAGATGA-3'<br>R: 5'-GTCGTCAGGATCGCAGATGAAG-3'  |
| <i>Nfle2l2</i>     | F: 5'-TGAAGCTCAGCTCGCATTGA-3'<br>R: 5'-TGCTCCAGCTCGACAATGTT-3'   |
| <i>Hmox1</i>       | F: 5'-GAGCAGAACCAGCCTGAACT-3'<br>R: 5'-AAATCCTGGGGCATGCTGTC-3'   |
| <i>Gclm</i>        | F: 5'-GACAAAACACAGTTGGAACAGC-3'<br>R: 5'-CAGTCAAATCTGGTGGCATC-3' |
| <i>Pre-Myc</i>     | F: 5'-TGTGATCTTCCACTTCCTCCCT-3'<br>R: 5'-GACCTCTTGGCAGGGGTTTG-3' |
| <i>Hprt</i>        | F: 5'-TCCTCAGACCGCTTTTGGCC-3'<br>R: 5'-CTAATCACGACGCTGGGACT-3'   |
| <b>Gene Symbol</b> | <b>ChIP quantitative PCR Primer Sequence</b>                     |
| <i>Hmox1</i>       | F: 5'-CCCCACAGGAGCTGAACTTT-3'<br>R: 5'-TCTGCTAATCACCCCTCCCA-3'   |
| <i>Srxn1</i>       | F: 5'-TGGCTTTACTTCGTGGAGGC-3'<br>R: 5'-AGATCTGCCCAGAGAGGATGA-3'  |
| <i>Myc R1</i>      | F: 5'-GTAGCTCAGAGACAAAGCCC-3'<br>R: 5'-TCCTGTGCCACTCTACCTAC-3'   |
| <i>Myc R2</i>      | F: 5'-TGGCGGGAAAAAGAAGGGAG-3'<br>R: 5'-CCCTCTGTCTCTCGCTGGAA-3'   |
| <i>Hbb-b1</i>      | F: 5'-TGCTCAGAATCAAACCCAAGG-3'<br>R: 5'-GGGCAACAATGATTTGGGTGC-3' |
